# Supplementary material for: A Novel Strategy to Reveal the Landscape of Crossovers in an F1 Hybrid Population of Populus deltoides and Populus simonii
Source: MDPI journal article supplement (doi:10.3390/plants11081046), 2022-04-12
Supplement: s1 [file s1]

**Text S1.** Calculation of the coefficient of coincidence between the two adjacent SNP intervals for the female parent in an F<sub>1</sub> population of *Populus deltoides* and *Populus simonii*

Considering three ordered SNPs of 1, 2, and 3 that segregate in  $ab \times aa$ , the counts and frequencies of the genotypes at the three SNPs in an F<sub>1</sub> hybrid population of *P. deltoides* and *P. simonii* under different linkage phases are listed in Table S2, where  $r_{ij}$  denotes the frequency of crossovers that occur ( $i = 1$ ) or not ( $i = 0$ ) in the first interval between SNPs 1 and 2 and that occur ( $j = 1$ ) or not ( $j = 0$ ) in the second interval between SNPs 2 and 3.

Let  $C$  denote the coefficient of coincidence between the first and second intervals. Then, under the linkage phase of case 1 (Table S2), the crossover frequencies can be expressed as following

$$\begin{cases} r_{11} = r_1 r_2 C \\ r_{01} = r_2 - r_1 r_2 C \\ r_{10} = r_1 - r_1 r_2 C \\ r_{00} = 1 - r_1 - r_2 + r_1 r_2 C \end{cases} \quad (S1)$$

where  $r_1$  and  $r_2$  are the recombination fractions of the first and second intervals, respectively. When  $r_1$  and  $r_2$  are known, the likelihood of the coefficient of coincidence can be written as

$$L(C) = \frac{n!}{\prod_{j=1}^8 n_j!} \left(\frac{1}{2} r_{00}\right)^{n_1+n_8} \left(\frac{1}{2} r_{01}\right)^{n_2+n_7} \left(\frac{1}{2} r_{10}\right)^{n_4+n_5} \left(\frac{1}{2} r_{11}\right)^{n_3+n_6} \quad (S2)$$

where  $n = n_1 + n_2 + \dots + n_8$ .

The derivatives of the log-likelihood with respect to  $r_1$ ,  $r_2$ , and  $C$  can be derived to be

$$\begin{cases} \frac{\partial \ln L}{\partial r_1} = \frac{n_3 + n_6}{r_1} + \frac{n_4 + n_5}{r_1} - \frac{(n_2 + n_7)C}{1 - r_1 C} - \frac{(n_1 + n_8)(1 - r_2 C)}{1 - r_1 - r_2 + r_1 r_2 C} \\ \frac{\partial \ln L}{\partial r_2} = \frac{n_3 + n_6}{r_2} - \frac{(n_4 + n_5)C}{1 - r_2 C} + \frac{n_2 + n_7}{r_2} - \frac{(n_1 + n_8)(1 - r_1 C)}{1 - r_1 - r_2 + r_1 r_2 C} \\ \frac{\partial \ln L}{\partial C} = \frac{n_3 + n_6}{C} - \frac{(n_4 + n_5)r_2}{1 - r_2 C} - \frac{(n_2 + n_7)r_1}{1 - r_1 C} + \frac{(n_1 + n_8)r_1 r_2}{1 - r_1 - r_2 + r_1 r_2 C} \end{cases} \quad (S3)$$

If we set the derivatives above to be zero, then the MLEs of  $r_1$ ,  $r_2$ , and  $C$  can be solved as following

$$\begin{cases} \hat{r}_1 = \frac{1}{n} (n_3 + n_4 + n_5 + n_6) \\ \hat{r}_2 = \frac{1}{n} (n_2 + n_3 + n_6 + n_7) \\ \hat{C} = \frac{n_3 + n_6}{n \hat{r}_1 \hat{r}_2} \end{cases} \quad (S4)$$

For the other cases of linkage phase (Table S2), the MLE of the parameters can be similarly derived as following,

$$\begin{cases} \hat{r}_1 = \frac{1}{n} (n_3 + n_4 + n_5 + n_6) \\ \hat{r}_2 = \frac{1}{n} (n_1 + n_4 + n_5 + n_8) \\ \hat{C} = \frac{n_4 + n_5}{n \hat{r}_1 \hat{r}_2} \end{cases} \quad \text{for case 2} \quad (S5)$$

$$\begin{cases} \hat{r}_1 = \frac{1}{n}(n_1 + n_2 + n_7 + n_8) \\ \hat{r}_2 = \frac{1}{n}(n_1 + n_4 + n_5 + n_8) \\ \hat{C} = \frac{n_1 + n_8}{n\hat{r}_1\hat{r}_2} \end{cases} \quad \text{for case 3} \quad (S6)$$

$$\begin{cases} \hat{r}_1 = \frac{1}{n}(n_1 + n_2 + n_7 + n_8) \\ \hat{r}_2 = \frac{1}{n}(n_2 + n_3 + n_6 + n_7) \\ \hat{C} = \frac{n_2 + n_7}{n\hat{r}_1\hat{r}_2} \end{cases} \quad \text{for case 4} \quad (S7)$$

**Table S2.** The counts and frequencies of genotypes at SNPs 1, 2, and 3 that segregate in  $ab \times aa$  under different linkage phases.

| Linkage Phase |                          |            | Genotype |       | Count | Frequency  |
|---------------|--------------------------|------------|----------|-------|-------|------------|
|               |                          |            | SNPs     | 1 2 3 |       |            |
| Case 1        |                          |            | aa aa aa |       | $n_1$ | $r_{00}/2$ |
|               |                          |            | aa aa ab |       | $n_2$ | $r_{01}/2$ |
| SNP 1         | $a \mid b$               | $b \mid a$ | aa ab aa |       | $n_3$ | $r_{11}/2$ |
| SNP 2         | $a \mid b$ or $b \mid a$ |            | aa ab ab |       | $n_4$ | $r_{10}/2$ |
| SNP 3         | $a \mid b$               | $b \mid a$ | ab aa aa |       | $n_5$ | $r_{10}/2$ |
|               |                          |            | ab aa ab |       | $n_6$ | $r_{11}/2$ |
|               |                          |            | ab ab aa |       | $n_7$ | $r_{01}/2$ |
|               |                          |            | ab ab ab |       | $n_8$ | $r_{00}/2$ |
| Case 2        |                          |            | aa aa aa |       | $n_1$ | $r_{01}/2$ |
|               |                          |            | aa aa ab |       | $n_2$ | $r_{00}/2$ |
| SNP 1         | $a \mid b$               | $b \mid a$ | aa ab aa |       | $n_3$ | $r_{10}/2$ |
| SNP 2         | $a \mid b$ or $b \mid a$ |            | aa ab ab |       | $n_4$ | $r_{11}/2$ |
| SNP 3         | $b \mid a$               | $a \mid b$ | ab aa aa |       | $n_5$ | $r_{11}/2$ |
|               |                          |            | ab aa ab |       | $n_6$ | $r_{10}/2$ |
|               |                          |            | ab ab aa |       | $n_7$ | $r_{00}/2$ |
|               |                          |            | ab ab ab |       | $n_8$ | $r_{01}/2$ |
| Case 3        |                          |            | aa aa aa |       | $n_1$ | $r_{11}/2$ |
|               |                          |            | aa aa ab |       | $n_2$ | $r_{10}/2$ |
| SNP 1         | $a \mid b$               | $b \mid a$ | aa ab aa |       | $n_3$ | $r_{00}/2$ |
| SNP 2         | $b \mid a$ or $a \mid b$ |            | aa ab ab |       | $n_4$ | $r_{01}/2$ |
| SNP 3         | $a \mid b$               | $b \mid a$ | ab aa aa |       | $n_5$ | $r_{01}/2$ |
|               |                          |            | ab aa ab |       | $n_6$ | $r_{00}/2$ |
|               |                          |            | ab ab aa |       | $n_7$ | $r_{10}/2$ |
|               |                          |            | ab ab ab |       | $n_8$ | $r_{11}/2$ |
| Case 4        |                          |            | aa aa aa |       | $n_1$ | $r_{10}/2$ |
|               |                          |            | aa aa ab |       | $n_2$ | $r_{11}/2$ |
| SNP 1         | $a \mid b$               | $b \mid a$ | aa ab aa |       | $n_3$ | $r_{01}/2$ |
| SNP 2         | $b \mid a$ or $a \mid b$ |            | aa ab ab |       | $n_4$ | $r_{00}/2$ |
| SNP 3         | $b \mid a$               | $a \mid b$ | ab aa aa |       | $n_5$ | $r_{00}/2$ |
|               |                          |            | ab aa ab |       | $n_6$ | $r_{01}/2$ |
|               |                          |            | ab ab aa |       | $n_7$ | $r_{11}/2$ |
|               |                          |            | ab ab ab |       | $n_8$ | $r_{10}/2$ |
